# Supplementary material
Source: Research Square preprint supplement (doi:10.21203/rs.3.rs-8665280/v1)
Supplement: Supplementary file 1 [file 6f218b67729c340fb88f0645.docx]

# Table S3.Survey-Weighted Unadjusted Odds Ratios for Serious Psychological Distress Among U.S. Adult Cancer Survivors (NHIS 2024)

| **Predictor** | **Category** | **OR** | **CI** | **P_value** |
| --- | --- | --- | --- | --- |
| **Age group** | **45–64** | **0.44** | **0.24–0.82** | **0.010** |
| **Age group** | **65+** | **0.22** | **0.12–0.39** | **<0.001** |
| **Sex** | **Female** | **1.86** | **1.16–2.98** | **0.010** |
| **Race/ethnicity** | **NH Black** | **0.68** | **0.29–1.60** | **0.373** |
| **Race/ethnicity** | **Hispanic** | **0.74** | **0.34–1.63** | **0.455** |
| **Race/ethnicity** | **NH Asian/Other** | **2.13** | **0.86–5.27** | **0.102** |
| **Education** | **Some college / AA** | **0.83** | **0.41–1.65** | **0.588** |
| **Education** | **Bachelor+** | **0.93** | **0.48–1.79** | **0.828** |
| **Income (% FPL)** | **200–399% FPL** | **0.41** | **0.17–1.00** | **0.050** |
| **Income (% FPL)** | **≥400% FPL** | **0.49** | **0.24–1.03** | **0.062** |
| **Insurance** | **Medicare** | **2.25** | **1.37–3.71** | **0.001** |
| **Insurance** | **Medicaid/Uninsured** | **6.50** | **3.66–11.51** | **<0.001** |
| **BMI category** | **Overweight/Obese** | **1.07** | **0.67–1.72** | **0.774** |
| **Telehealth use** | **Yes** | **1.96** | **1.27–3.03** | **0.003** |
| **Transportation barrier** | **Yes** | **6.06** | **3.50–10.48** | **<0.001** |
| **≥2 comorbidities** | **≥2 comorbidities** | **3.40** | **1.55–7.47** | **0.002** |
| **Functional limitation** | **Yes** | **15.65** | **4.49–54.58** | **<0.001** |
| **Cancer type** | **Lung** | **2.16** | **0.85–5.50** | **0.105** |
| **Cancer type** | **Other** | **1.59** | **0.97–2.60** | **0.067** |
| **Social support** | **Low** | **5.20** | **3.43–7.89** | **<0.001** |
| **Loneliness** | **Often** | **11.64** | **7.25–18.69** | **<0.001** |
| **Life satisfaction** | **Dissatisfied** | **12.47** | **7.64–20.36** | **<0.001** |

Odds ratios (ORs) and 95% confidence intervals were estimated using survey-weighted logistic regression models accounting for the sampling design of the 2024 National Health Interview Survey (NHIS), including stratification, primary sampling units, and person-level weights. Each estimate represents **a separate unadjusted (single-predictor) model** with clinically significant psychological distress as the outcome, defined as a Kessler 6 score ≥13. Estimates are weighted to represent the U.S. civilian, noninstitutionalized adult population of cancer survivors.

Percentages of federal poverty level (FPL) were calculated using NHIS income-to-poverty ratio variables. Reference categories were as follows: age 18–44 years, male sex, non-Hispanic White race/ethnicity, high school education or less, <200% FPL, private insurance, normal/underweight BMI, no telehealth use, no transportation barrier, fewer than 2 comorbidities, no functional limitation, breast/prostate cancer, high social support, infrequent loneliness, and satisfied with life.

This table is descriptive in nature. Observed associations are unadjusted and may reflect confounding or shared underlying vulnerability; formal inference regarding independent associations is presented in adjusted analyses in the main manuscript.
