# Supplementary material
Source: Research Square preprint supplement (doi:10.21203/rs.3.rs-8665280/v1)
Supplement: Supplementary file 2 [file 9b798bfd6c89cafd19e77669.docx]

Table S4. Survey-Weighted Unadjusted Odds Ratios for Unmet Mental Health Care Need Among U.S. Adult Cancer Survivors, National Health Interview Survey 2024

| Predictor | Category | OR | CI | P_value |
| --- | --- | --- | --- | --- |
| Age group | 45–64 | 0.58 | 0.32–1.03 | 0.065 |
| Age group | 65+ | 0.09 | 0.04–0.17 | <0.001 |
| Sex | Female | 7.07 | 3.71–13.47 | <0.001 |
| Race/ethnicity | NH Black | 0.63 | 0.19–2.13 | 0.460 |
| Race/ethnicity | Hispanic | 2.12 | 1.10–4.08 | 0.025 |
| Race/ethnicity | NH Asian/Other | 2.08 | 0.77–5.67 | 0.151 |
| Education | Some college / AA | 2.33 | 1.02–5.35 | 0.046 |
| Education | Bachelor+ | 1.65 | 0.68–4.05 | 0.271 |
| Income (% FPL) | 200–399% FPL | 0.57 | 0.14–2.38 | 0.443 |
| Income (% FPL) | ≥400% FPL | 0.64 | 0.22–1.83 | 0.406 |
| Insurance | Medicare | 0.76 | 0.41–1.43 | 0.394 |
| Insurance | Medicaid/Uninsured | 3.66 | 2.07–6.46 | <0.001 |
| BMI category | Overweight/Obese | 1.16 | 0.68–1.98 | 0.574 |
| Telehealth use | Yes | 2.03 | 1.28–3.24 | 0.003 |
| Transportation barrier | Yes | 4.99 | 2.89–8.61 | <0.001 |
| ≥2 comorbidities | ≥2 comorbidities | 0.99 | 0.58–1.69 | 0.967 |
| Functional limitation | Yes | 1.76 | 1.00–3.11 | 0.052 |
| Cancer type | Lung | 0.67 | 0.13–3.51 | 0.634 |
| Cancer type | Other | 2.06 | 1.18–3.61 | 0.012 |
| Social support | Low | 4.83 | 2.90–8.03 | <0.001 |
| Loneliness | Often | 5.18 | 3.17–8.46 | <0.001 |
| Life satisfaction | Dissatisfied | 7.06 | 4.04–12.36 | <0.001 |

Odds ratios (ORs) and 95% confidence intervals were estimated using survey-weighted logistic regression models accounting for the complex sampling design of the 2024 National Health Interview Survey (NHIS), including stratification, primary sampling units, and person-level weights. Each estimate represents a **separate unadjusted (single-predictor) model** with unmet mental health care need as the outcome, defined as self-reported inability to obtain needed mental health counseling or treatment in the past 12 months. Estimates are weighted to represent the U.S. civilian, noninstitutionalized adult population of cancer survivors.

Percentages of federal poverty level (FPL) were calculated using NHIS income-to-poverty ratio variables. Reference categories were as follows: age 18–44 years, male sex, non-Hispanic White race/ethnicity, high school education or less, <200% FPL, private insurance, normal/underweight BMI, no telehealth use, no transportation barrier, fewer than 2 comorbidities, no functional limitation, breast/prostate cancer, high social support, infrequent loneliness, and satisfied with life.

This table is descriptive in nature. Observed associations are unadjusted and may reflect confounding or shared underlying vulnerability; formal inference regarding independent associations is presented in adjusted analyses in the main manuscript.
