# Supplementary material
Source: Research Square preprint supplement (doi:10.21203/rs.3.rs-8665280/v1)
Supplement: Supplementary file 3 [file c1fd2504af1fd0b9fc2f20c9.docx]

Table S1. Weighted Prevalence of Serious Psychological Distress Among U.S. Cancer Survivors (NHIS 2024)

| Characteristic | Category | Prevalence (%) | 95% CI |
| --- | --- | --- | --- |
| Overall |  | 3.8 | 3–4.6 |
| Age group | 18–44 | 10.2 | 5.5–14.9 |
| Age group | 45–64 | 4.8 | 3.1–6.5 |
| Age group | 65+ | 2.4 | 1.7–3.1 |
| Sex | Male | 2.6 | 1.7–3.6 |
| Sex | Female | 4.8 | 3.5–6 |
| Race/ethnicity | Non-Hispanic White | 3.8 | 2.9–4.6 |
| Race/ethnicity | Non-Hispanic Black | 2.6 | 0.5–4.6 |
| Race/ethnicity | Non-Hispanic Asian | 8.5 | -0.6–17.7 |
| Race/ethnicity | Hispanic | 2.8 | 0.8–4.8 |
| Race/ethnicity | Other | 6.1 | 0.8–11.5 |
| Education | < High school | 5.2 | 2–8.5 |
| Education | High school / GED | 9.1 | 1.1–17.1 |
| Education | Some college | 8.5 | 2.7–14.3 |
| Education | Associate degree | 4.5 | 2.2–6.7 |
| Education | Bachelor’s degree | 4.4 | 2.5–6.3 |
| Education | Graduate / professional | 13.1 | 6.3–19.9 |
| Income (% FPL) | <100% FPL | 21.4 | 4.4–38.4 |
| Income (% FPL) | 100–199% FPL | 13.5 | 4.8–22.3 |
| Income (% FPL) | 200–399% FPL | 7.5 | 3.1–11.9 |
| Income (% FPL) | ≥400% FPL | 8.9 | 5.9–11.8 |
| Insurance | Private | 2.1 | 1.4–2.8 |
| Insurance | Medicare | 4.6 | 3.1–6.1 |
| Insurance | Medicaid | 14.4 | 7.5–21.2 |
| Insurance | Uninsured | 14.1 | 3.6–24.5 |
| Insurance | Other | 3.8 | -3.4–11 |
| BMI category | Underweight | 6.6 | 1.1–12 |
| BMI category | Normal | 3.4 | 1.9–4.9 |
| BMI category | Overweight | 2.4 | 1.4–3.3 |
| BMI category | Obese | 5.5 | 3.9–7 |
| Telehealth use | No | 2.9 | 2.1–3.8 |
| Telehealth use | Yes | 5.6 | 3.8–7.3 |
| Transportation barrier | No | 3.0 | 2.2–3.7 |
| Transportation barrier | Yes | 15.7 | 9.4–22 |
| ≥2 comorbidities | <2 comorbidities | 1.4 | 0.4–2.5 |
| ≥2 comorbidities | ≥2 comorbidities | 4.6 | 3.6–5.6 |
| Functional limitation | No | 0.4 | -0.1–0.8 |
| Functional limitation | Yes | 5.5 | 4.3–6.7 |
| Cancer type | Breast | 3.9 | 2.1–5.6 |
| Cancer type | Prostate | 1.2 | 0–2.4 |
| Cancer type | Lung | 5.8 | 1.2–10.3 |
| Cancer type | Other | 4.3 | 3.2–5.4 |
| Social support | High | 2.3 | 1.6–2.9 |
| Social support | Low | 10.7 | 7.8–13.7 |
| Loneliness | Not often | 1.1 | 0.7–1.6 |
| Loneliness | Often | 11.7 | 8.9–14.4 |
| Life satisfaction | Satisfied | 2.5 | 1.8–3.1 |
| Life satisfaction | Dissatisfied | 24.0 | 16.5–31.5 |

Estimates represent survey-weighted prevalence of **serious psychological distress (SPD)** among U.S. adult cancer survivors, calculated using data from the 2024 National Health Interview Survey (NHIS). SPD was defined as a Kessler 6 (K6) score ≥13. All estimates account for the complex NHIS sampling design, including stratification, primary sampling units, and person-level weights, to produce nationally representative estimates of the U.S. civilian, noninstitutionalized adult cancer survivor population.

Prevalence values are reported as weighted percentages with 95% confidence intervals (CIs) derived using Taylor series linearization. For subgroups with small effective sample sizes, CIs may be wide or extend below 0%; such negative lower bounds reflect statistical uncertainty from the normal approximation and should be interpreted as effectively 0%.

Estimates are descriptive and unadjusted. Differences across subgroups do not imply causal associations; multivariable adjusted associations are presented elsewhere in the manuscript.
