# Supplementary material
Source: Research Square preprint supplement (doi:10.21203/rs.3.rs-8665280/v1)
Supplement: Supplementary file 4 [file cdb09954e492c7063e0c18ac.docx]

# Table 2S. Survey-Weighted Prevalence of Unmet Mental Health Need Among U.S. Adult Cancer Survivors, NHIS 2024

| Characteristic | Category | Prevalence (%) | 95% CI |
| --- | --- | --- | --- |
| Overall prevalence |  | 3.4 | 2.7–4.2 |
| Age group | 18–44 | 10.5 | 5.9–15.0 |
| 45–64 | 6.3 | 4.4–8.3 |
| 65+ | 1.0 | 0.6–1.4 |
| Sex | Male | 0.8 | 0.4–1.3 |
| Female | 5.6 | 4.3–6.9 |
| Race/ethnicity | NH White | 3.1 | 2.3–3.9 |
| NH Black | 2.0 | -0.3–4.3 |
| NH Asian | 6.0 | -2.2–14.2 |
| Hispanic | 6.3 | 2.8–9.9 |
| Other | 6.7 | 0.4–13.1 |
| Education | < High school | 1.5 | 0.2–2.7 |
| High school / GED | 5.3 | -0.8–11.4 |
| Some college | 4.1 | -0.6–8.9 |
| Associate degree | 5.3 | 2.9–7.7 |
| Bachelor’s degree | 3.7 | 1.6–5.7 |
| Graduate / professional | 3.7 | 0.6–6.9 |
| Income (% FPL) | <100% FPL | 13.4 | -3.4–30.3 |
| 100–199% FPL | 5.5 | 0.8–10.1 |
| 200–399% FPL | 5.0 | -0.1–10.1 |
| ≥400% FPL | 5.6 | 3.3–7.9 |
| Insurance | Private | 3.1 | 2.1–4.1 |
| Medicare | 2.4 | 1.2–3.6 |
| Medicaid | 8.4 | 4.0–12.8 |
| Uninsured | 24.1 | 10.0–38.2 |
| Other | 1.0 | -1.0–2.9 |
| BMI category | Underweight | 5.5 | 0.6–10.4 |
| Normal | 3.0 | 1.5–4.5 |
| Overweight | 2.1 | 1.2–3.0 |
| Obese | 5.3 | 3.7–7.0 |
| Telehealth use | No | 2.6 | 1.8–3.4 |
| Yes | 5.2 | 3.5–6.8 |
| Transportation barrier | No | 2.7 | 2.0–3.5 |
| Yes | 12.3 | 7.3–17.2 |
| ≥2 comorbidities | <2 comorbidities | 3.5 | 2.0–5.0 |
| ≥2 comorbidities | 3.4 | 2.5–4.3 |
| Functional limitation | No | 2.3 | 1.2–3.4 |
| Yes | 4.0 | 3.0–5.0 |
| Cancer type | Breast | 3.7 | 2.0–5.4 |
| Prostate | 0.0 | 0.0–0.0 |
| Cancer type | Lung | 1.4 | -0.8–3.7 |
| Other | 4.3 | 3.2–5.4 |
| Social support | High | 2.1 | 1.5–2.8 |
| Low | 9.5 | 6.1–12.8 |
| Loneliness | Not often | 1.7 | 1.1–2.3 |
| Often | 8.3 | 5.9–10.8 |
| Life satisfaction | Satisfied | 2.6 | 1.9–3.3 |
| Dissatisfied | 15.9 | 9.4–22.4 |

Values are survey-weighted prevalences with 95% confidence intervals (CIs) derived from the 2024 National Health Interview Survey (NHIS). Estimates represent U.S. adult cancer survivors and account for the NHIS complex sampling design, including survey weights, stratification, and clustering. Unmet mental health care need was defined as self-reported inability to obtain needed mental health counseling or treatment in the past 12 months. Prevalence estimates are presented within levels of each characteristic (row percentages).
